# Supplementary material
Source: PubMed Central journal article supplement (PMC8603302)
Supplement: NIHMS1550186-supplement-1.pdf [file NIHMS1550186-supplement-1.pdf]

## **Supplementary materials.**

### **Online methods.**

#### **Ethics and animals.**

All procedures were approved by the Institutional Animal Care and Use Committees of Boston Children's Hospital, Harvard Medical School and the Université de Montréal (CDEA #19027; #19028). 8-week old male and female mice were purchased from Jackson Laboratory and housed in standard environmental conditions (12h light/dark cycle; 23°C; food and water ad libitum) at facilities accredited by the Association for Assessment and Accreditation of Laboratory Animal Care.

#### **Mouse lines.**

BALB/c (Stock No: 001026), Tac1<sup>-/-</sup> (B6.Cg-Tac1tm1Bbm/J; Stock No: 004103), Rag1<sup>-/-</sup> (B6.129S7-Rag1tm1Mom/J; Stock No: 002216), Tac1<sup>Cre</sup> (B6;129S-Tac1tm1.1(cre)Hze/J; Stock No: 021877), DTA<sup>fl/fl</sup> (B6.129P2-Gt26Sortm1(DTA)Lky/J; Stock No: 009669), Chr2<sup>fl/fl</sup> (B6.Cg-Gt(ROSA)26Sortm27.1(CAG-COP4\*H134R/tdTomato)Hze/J; Stock No: 012567), CHAT<sup>Chr2</sup>-eYFP (B6.Cg-Tg(Chat-COP4\*H134R/EYFP,Slc18a3)6Gfng/J; Stock No: 014546). We used the cre/lox toolbox to genetically-engineered the various mice lines used (TRPV1<sup>cre/wt::DTA<sup>fl/wt</sup></sup>, TRPV1<sup>cre/wt::Chr2<sup>fl/wt</sup></sup>, Tac1<sup>cre/wt::Chr2<sup>fl/wt</sup></sup> and littermate control) by crossing male heterozygote Cre mice to female homozygous loxP mice (1). All Cre driver lines used are viable and fertile and abnormal phenotypes were not detected. Offspring were tail clipped; tissue was used to assess the presence of transgene by standard PCR, as described by Jackson Laboratory. Offspring were used at 8 weeks of age.

#### **Asthma model**

Allergic airway inflammation was studied in an ovalbumin (OVA) based model (1, 2). On day 0 and 7, mice were sensitized by a 200 µl i.p. injections of a solution containing 1 mg/ml ovalbumin (Sigma-Aldrich) and 5 mg/ml aluminum hydroxide (Sigma-Aldrich, Boston, Ma). On day 14-17 (10:00 am) mice were exposed to 6% OVA aerosol for 25min to induce airways allergic inflammation. Drugs were nebulized on day 18 (10:00 am) and outcome assessed on day 21 (10:00 am).

#### **Drugs**

QX-314(1, 3) (Charged lidocaine derivative, Tocris #2313), Carbachol (muscarinic agonist; Sigma #PHR1511), [Sar<sup>9</sup>, Met(O<sub>2</sub>)<sup>11</sup>]-SP (NK1R stable agonist, Tocris # 1178) were diluted fresh in sterile PBS at various concentrations. Capsaicin (TRPV1 selective agonist, Sigma #M2028) was diluted in ethanol.

#### **ELISA**

Mice were anesthetized with urethane and a 20G sterile catheter inserted longitudinally into the trachea. 2 ml of ice-cold PBS with protease inhibitor cocktail (1x Sigma Fast Protease Inhibitor (Sigma #S8820) and 10µM epoxomicin (Enzo #BMLPI127100,)) was injected into the lung, harvested and underwent a 400g centrifugation (15 min; 4°C) (4). The cells were discarded. Samples were processed according to instruction using commercial ELISA kit specifically designed for substance P (5) (Phoenix Pharmaceuticals; catalog number EK-064-05), Muc5B (LSBio # LS-F22247), and Muc5AC (LSBio #LS-F4842). For SP ELISAs, BALF were concentrated to a final 200 µl volume following a 3h RT SpeedVac (Thermo Scientific; SpeedVac Concentrator, SPD1010) cycle (1).

#### **Histology**

Lungs were inflated to 20 cm H<sub>2</sub>O with 1x zinc fixative (BD Pharmigen), the trachea was ligated, and lungs stored overnight in zinc fixative (RT, mild shaking). The lungs were then washed in PBS and serially immersed in 30, 50 and 70 % Ethanol solution (20 min/each solution; RT). Tissues were embedded in paraffin, serially cut at 4µm and stained with Alcian Blue (AB; Sigma #66011500MLF) to assess goblet cell hyperplasia (6) and with Periodic Acid Schiff (PAS; Abcam #ab150680) base solution to assess mucus deposition (7). Two blinded investigators scored 384 randomized/scrambled images per condition (6 zones/slide; 4 slides/animal and 3-4 animals/group). PAS scores range from 0 (absence of goblet cells) to 4 (extensive goblets cells in large and small diameter bronchioles). AB was scored using ImageJ has relative intensity (Arbitrary Unit) over background.

#### **Immunofluorescence**

Upon harvesting, inflated lungs were post-fixed overnight in 4% para-formaldehyde, wash in PBS and cryoprotected by sequential sucrose immersion (PBS 10-30% sucrose, Overnight). Sections were then mounted in O.C.T. (Tissue-tek), and serially cut in 20 µm coronal sections with a cryostat. The sections were thaw-mounted on Fisherbrad superfrost

56 microscopy slides and kept at -80°C. On the day of the experiment, sections were thawed at room temperature for 10 min.  
57 Sections were washed in PBS for 5 min, blocked for 1h at room temperature (PBS, 0.1% Triton X-100, 5% BSA) and exposed  
58 to the primary antibodies (Overnight, 4°C), namely rabbit anti-mouse Muc5B (Abcam # ab87376), mouse Anti-mouse  
59 Muc5AC (Thermofisher #MA5-12178). Other antibodies tested include anti-Muc5AC (Thermofisher #MA5-12178), anti-  
60 Muc5B (Abcam #ab77995), rabbit anti-mouse Muc5B (BioS USA #bs-2414R-A555), or rabbit anti-mouse Muc5AC (Novus  
61 #NBP2-15196AF405). Sections were then washed three times in PBS (5 min), exposed to the secondary antibodies (2h,  
62 dark), washed, coverslipped with vectashield with DAPI (Vector Labs #H-1200) and observed under fluorescent microscope  
63 (Nikon. Eclipse Ti2-U).

#### 64 65 **Fluorescent *in situ* hybridization.**

66 Inflated lungs were post-fixed overnight in 4% para-formaldehyde, wash in PBS and cryoprotected by sequential sucrose  
67 immersion (PBS 10-30% sucrose, Overnight). Sections were mounted in O.C.T. (Tissue-tek), and serially cut in 20 µm  
68 coronal sections with a cryostat. The sections were thaw-mounted on fisherbrad superfrost microscopy slides and kept at -  
69 80°C. On the day of the experiment, sections were thawed at room temperature for 10 min. Fluorescent *in situ*  
70 hybridization was performed as described using the RNAscope® Fluorescent Multiplex Reagent Kit (ACD Bio #320850) The  
71 primary probes used to stain Muc5B was Mm-Muc5b (ACD Bio #471991) (8) and for Muc5AC was Mm-Muc5ac-C2 (ACD  
72 Bio #448471-C2) were used as described in the instruction (9). Sections were washed in PBS (5 min), coverslipped with  
73 Vectashield with DAPI (Vector Labs #H-1200) and observed under fluorescent microscope (Nikon. Eclipse Ti2-U).

#### 74 75 **Flow cytometry**

76 Lungs were gently lavages with PBS, harvested, digested and single cells resuspended in FACS buffer (PBS, 2% FCS, EDTA),  
77 and incubated with Fc block (0.5 mg/ml, 10 min; BD Biosciences). Cells were then stained with monoclonal antibodies  
78 (FITC anti-mouse CD45, BD Biosciences, cat no: 553079; Cy7 anti-mouse NK1R (10), Novus, NB300-119APCCY7; Dylight350  
79 anti-mouse Muc2, Novus, NB120-11197UV; 45 min, 4°C on ice). 10<sup>4</sup>- 10<sup>5</sup> CD45<sup>+</sup>Muc2<sup>+</sup> or CD45<sup>+</sup>NK1R<sup>+</sup> cells were isolated  
80 using a BD FACSAria™ III sorter (BD Biosciences) directly in Qiazol for subsequent qPCR measurement.

#### 81 82 **SYBR green-based quantitative real-time PCR.**

83 RNA was extracted from whole lungs or FACS-sorted Muc2<sup>+</sup> or NK1R<sup>+</sup> lung cells using Qiazol reagent, followed by the  
84 RNeasy mini kit (Qiagen, MD). DNase I treatment (Qiagen) was used to remove genomic DNA, and complementary DNA  
85 reverse transcribed using Superscript III with random hexamers (Life Technologies). For qPCR, cDNA was subjected to 2-  
86 step thermocycling using fast SYBR green master mix (Life Technologies), and data collection performed on an Applied  
87 Biosystems 7500 machine (Life Technologies) (1). Expression levels were normalized to β-actin using the ΔΔCt method.  
88 The following primers were used: β-actin forward (TCG TAC CAC AGG CAT TGT GAT GGA) (1), β-actin reverse (TGA  
89 TGT CAC GCA CGA TTT CCC TCT) (1), Muc5b forward (CTG GCA CCT GCT CTG TGC A) (11), Muc5b reverse (CAC TGC TTT  
90 GAG GCA GTT CT) (11), Muc5AC forward (ACC ACT TTC TCC TTC TCC ACA) (11), and Muc5AC reverse (ATG GAT GTT AGC  
91 CGT CCT G) (11).

#### 92 **Tracheal mucus secretion**

93 Upon euthanasia, mice tracheas were dissected and placed in ice-cold Krebs–Ringer bicarbonate buffer. The trachea was  
94 cut dorsally along its length and placed in a custom-built chamber mucosal side up so that the serosal side was bathed in  
95 ~60 µl Ringers, and the mucosal side was exposed to air (12). The luminal surface was gently cleaned with absorbent  
96 paper, dried with a stream of air, and coated with ~5 µl of mineral oil (Sigma #M5904). The luminal surface was not  
97 cleaned with absorbent paper during the experiments involving capsaicin or [Sar<sup>9</sup>, Met(O<sub>2</sub>)<sup>11</sup>]-SP to avoid tissue damage  
98 that might trigger nociceptive responses. Pharmacological agents (100µM Carbachol, 10µM capsaicin, 100µM QX-314,  
99 100µM [Sar<sup>9</sup>, Met(O<sub>2</sub>)<sup>11</sup>]-SP) (13) were added to the serosal side and images of droplets taken at 1s intervals using a digital  
100 camera (Nikon. Ti2-U) and analyzed using ImageJ (12). Secretion volumes were calculated using the formula  $V=1.3\pi r^3$ ,  
101 where r is the radius (12). To be included in the analysis, each droplet had to meet the following criteria: (a) a circular  
102 outline, so that it could be assumed to be spherical; (b) clear edges, to allow accurate measurement of the radius; and (c)  
103 no fusion with neighboring droplets. Viability was tested at the end of each experiment by measuring the response to  
104 carbachol, and those glands that did not respond to carbachol (<5% of total) were excluded from the analysis (12).  
105 Secretion rates were calculated as the slopes of cumulative volume vs. time plots after fitting at least three data points by  
106 linear regression (r<sup>2</sup>>0.8, rates in nanoliter per minute per gland) (12).

#### 107 108 **Vagus nerve optogenetic**

109 Animals were deeply anesthetized (isoflurane, 1.5%–2%, Abbott Laboratory), freely breathing, and maintained at normal  
110 body temperature. The left nodose/jugular complex was surgically exposed and an optic fiber (0.39 NA fiber, Thorlabs)

111 was coupled to a DPSS laser light source (473 nm, 100 mW, Ultralaser) was placed 5-10 mm from the nerve (14). Focal  
112 illumination was performed beneath the ganglion and above the pharyngeal and superior laryngeal branches of the left  
113 nodose/jugular complex (14). Thirty-minute light stimulation were as follow: 3.5 ms, 5Hz, 100 mW, which give approx. 2-6  
114 mW/mm<sup>2</sup> of power on the nerve, was controlled by a shutter system (Uniblitz) (15).  
115

116 **Statistics**

117 Data expressed as mean  $\pm$  S.E.M. Statistical significance determined by two-tail unpaired Student's t-test. P values less  
118 than 0.05 were considered significant. Numbers of animals are defined in figures.  
119  
120  
121

Journal Pre-proof

122  
123  
124  
125  
126  
127  
128  
129  
130  
131  
132  
133  
134  
135  
136  
137  
138  
139  
140  
141  
142  
143  
144  
145  
146  
147  
148  
149  
150  
151  
152  
153  
154  
155  
156  
157  
158  
159  
160  
161  
162  
163  
164  
165  
166  
167  
168  
169  
170  
171  
172  
173

**Online references.**

1. Talbot S, Abdunnour RE, Burkett PR, Lee S, Cronin SJ, Pascal MA, et al. Silencing Nociceptor Neurons Reduces Allergic Airway Inflammation. *Neuron*. 2015;87(2):341-54.
2. Haworth O, Cernadas M, Yang R, Serhan CN, Levy BD. Resolvin E1 regulates interleukin 23, interferon-gamma and lipoxin A4 to promote the resolution of allergic airway inflammation. *Nat Immunol*. 2008;9(8):873-9.
3. Binshtok AM, Bean BP, Woolf CJ. Inhibition of nociceptors by TRPV1-mediated entry of impermeant sodium channel blockers. *Nature*. 2007;449(7162):607-10.
4. Krause T, Rockendorf N, Gaede KI, Ramaker K, Sinnecker H, Frey A. Validation of antibody reagents for mucin analysis in chronic inflammatory airway diseases. *MAbs*. 2017;9(2):333-41.
5. Herberth G, Daegelmann C, Weber A, Roder S, Giese T, Kramer U, et al. Association of neuropeptides with Th1/Th2 balance and allergic sensitization in children. *Clin Exp Allergy*. 2006;36(11):1408-16.
6. Temann UA, Geba GP, Rankin JA, Flavell RA. Expression of interleukin 9 in the lungs of transgenic mice causes airway inflammation, mast cell hyperplasia, and bronchial hyperresponsiveness. *J Exp Med*. 1998;188(7):1307-20.
7. Gu W, Zhang X, Yan Y, Wang Y, Huang L, Wang M, et al. B7-H3 participates in the development of Asthma by augmentation of the inflammatory response independent of TLR2 pathway. *Sci Rep*. 2017;7:40398.
8. Chen G, Sun L, Kato T, Okuda K, Martino MB, Abzhanova A, et al. IL-1beta dominates the promucin secretory cytokine profile in cystic fibrosis. *J Clin Invest*. 2019;129(10):4433-50.
9. Han S, Fink J, Jorg DJ, Lee E, Yum MK, Chatzeli L, et al. Defining the Identity and Dynamics of Adult Gastric Isthmus Stem Cells. *Cell Stem Cell*. 2019;25(3):342-56 e7.
10. Zhou Y, Wang M, Tong Y, Liu X, Zhang L, Dong D, et al. miR-206 Promotes Cancer Progression by Targeting Full-Length Neurokinin-1 Receptor in Breast Cancer. *Technol Cancer Res Treat*. 2019;18:1533033819875168.
11. Ehre C, Worthington EN, Liesman RM, Grubb BR, Barbier D, O'Neal WK, et al. Overexpressing mouse model demonstrates the protective role of Muc5ac in the lungs. *Proc Natl Acad Sci U S A*. 2012;109(41):16528-33.
12. Ianowski JP, Choi JY, Wine JJ, Hanrahan JW. Substance P stimulates CFTR-dependent fluid secretion by mouse tracheal submucosal glands. *Pflugers Arch*. 2008;457(2):529-37.
13. Talbot S, Chahmi E, Dias JP, Couture R. Key role for spinal dorsal horn microglial kinin B1 receptor in early diabetic pain neuropathy. *J Neuroinflammation*. 2010;7(1):36.
14. Chang RB, Strohlic DE, Williams EK, Umans BD, Liberles SD. Vagal Sensory Neuron Subtypes that Differentially Control Breathing. *Cell*. 2015;161(3):622-33.
15. Browne LE, Latremoliere A, Lehnert BP, Grantham A, Ward C, Alexandre C, et al. Time-Resolved Fast Mammalian Behavior Reveals the Complexity of Protective Pain Responses. *Cell Rep*. 2017;20(1):89-98.

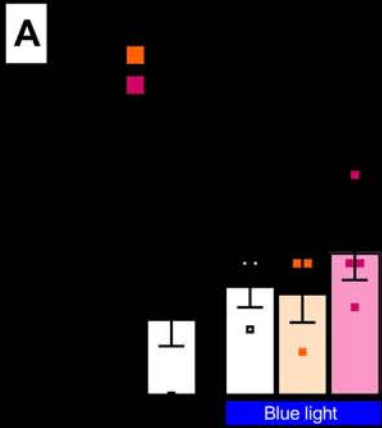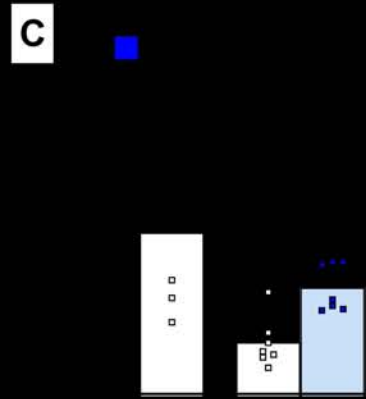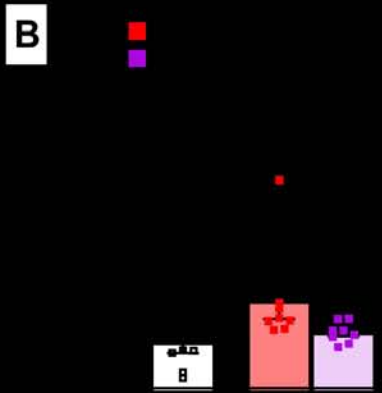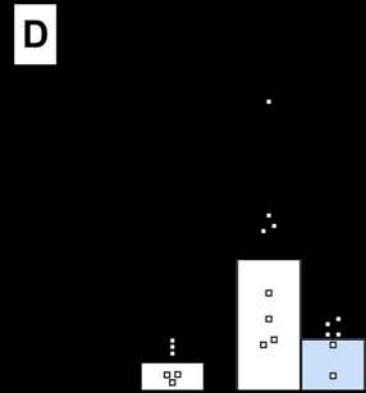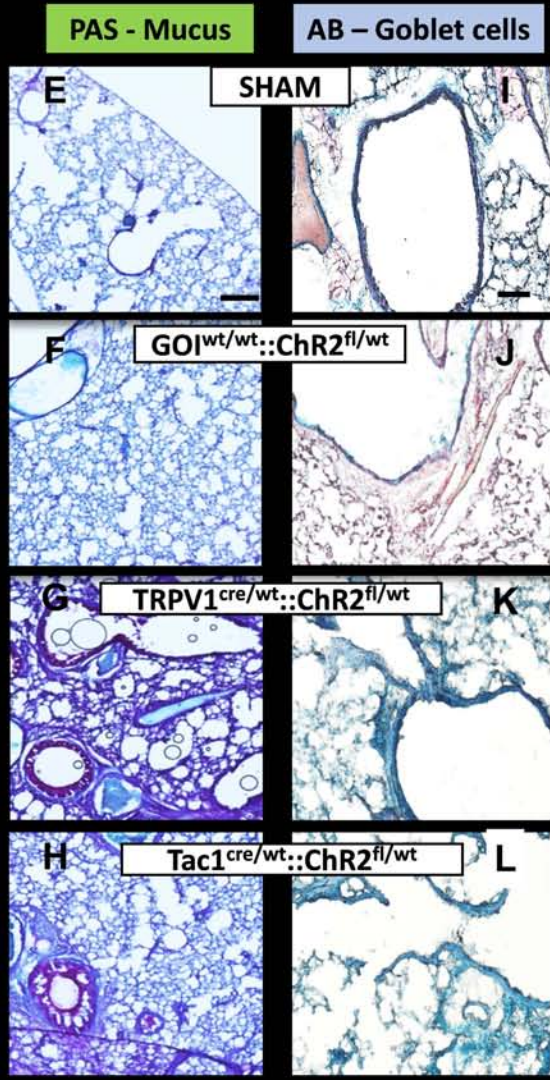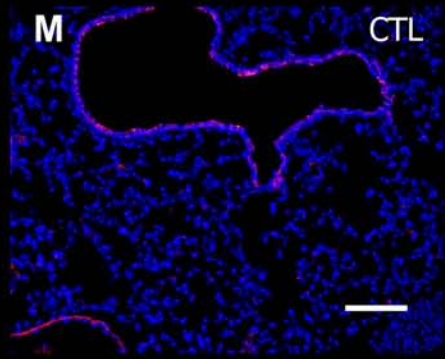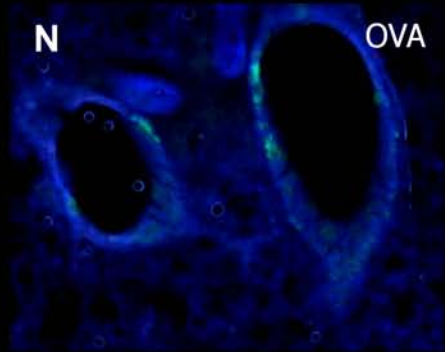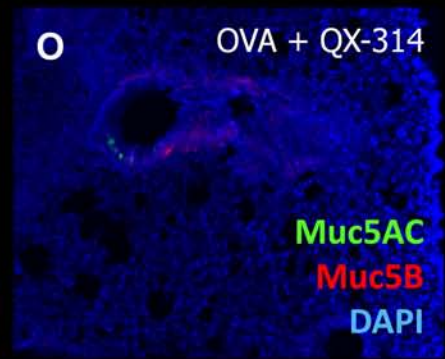

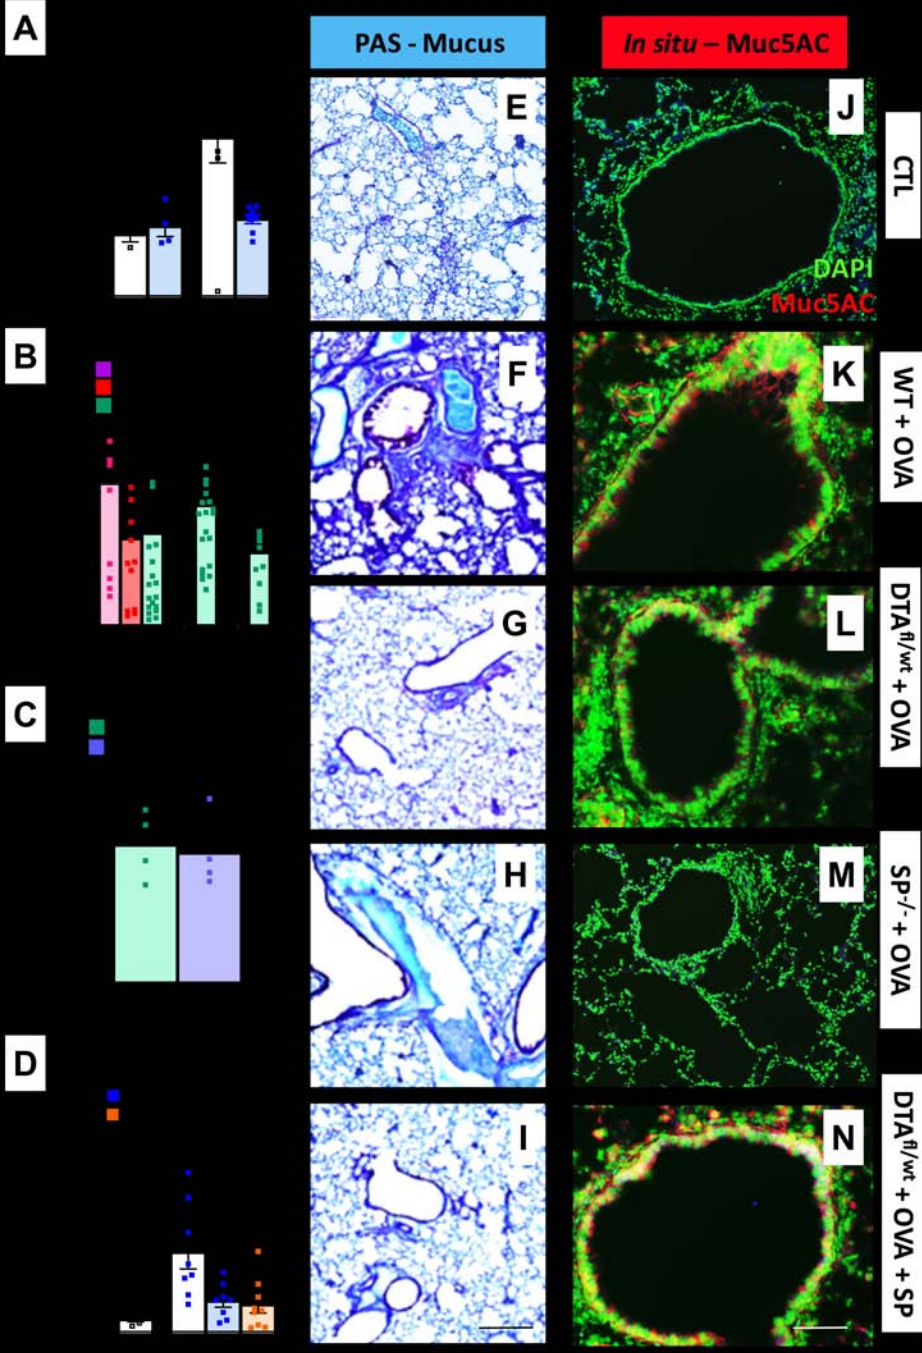

174 **Supplementary figure legends.**

175

176 **Supplementary figure 1: Silencing sensory neuron neurons rescues allergen-mediated mucin imbalance.** Optogenetic-  
177 stimulated (473nM, 5 Hz, 3.5 ms, 30 min, 100 mW) TRPV1<sup>cre/wt</sup>::ChR2<sup>fl/wt</sup>, Tac1<sup>cre/wt</sup>::ChR2<sup>fl/wt</sup> and littermate control mice  
178 did not affect goblet cell hyperplasia (A). An acute capsaicin (1 uM, i.n.; B) or repeated allergen-challenges (C, D) increased  
179 airway goblet cell transcript expression (B, C) or BALF levels (D) of Muc5AC over Muc5B, these effects were reversed by  
180 sensory neuron silencing using QX-314 (100 uM; B-D). SHAM (E, I), and optogenetic-stimulated littermate control (F, J),  
181 TRPV1<sup>cre/wt</sup>::ChR2<sup>fl/wt</sup> (G, K) and Tac1<sup>cre/wt</sup>::ChR2<sup>fl/wt</sup> (H, L) mice lung section stained for mucus deposition (PAS, purple; E-H;  
182 Scale 100 μm) and goblet cell hyperplasia (AB, blue; I-L; Scale 30 μm). DAPI-stained cell nucleus (blue), Muc5B (red),  
183 Muc5AC (green)-stained sections of naïve (M) and OVA-exposed (N, O) lungs treated with saline (M, N) or QX-314 (100  
184 μM; O). Scale 30 μm. Mean ± S.E.M; Two-tailed unpaired Student's t-test.

185

186 **Supplementary figure 2: Sensory neuron silencing blocks SP release.** OVA-challenge increased BALF Substance P, an  
187 effect prevented by sensory neuron silencing with QX-314 (100 μM, nebulized) (A). The TRPV1 agonist capsaicin (10 μM, 5  
188 min), the stable NK-1R agonist [Sar<sup>9</sup>-Met-(O<sub>2</sub>)<sup>11</sup>]-SP (100 μM, 5 min) and carbachol (100 μM, 30 min) induced mucus  
189 secretion from OVA-challenged mice trachea (B-C). Capsaicin had no effect when administered to TRPV1<sup>cre/wt</sup>::DTA<sup>fl/wt</sup> or  
190 Tac1<sup>-/-</sup> mice (B). QX-314 co-treatment do not impact carbachol (100 μM, 30 min) induced mucus secretion from OVA-  
191 challenged mice trachea (C). OVA-challenge increased lung NK-1R<sup>+</sup> goblet cells Muc5AC/Muc5B ratio, an effect prevented  
192 by sensory neuron silencing with QX-314 and absent in Tac1<sup>-/-</sup> mice (D). Representative periodic acid-Schiff (purple, E-I)  
193 and *Muc5ac in situ* hybridization staining (red, J-N) of naïve (E, J), OVA-challenge littermate control (F, K), OVA-challenge  
194 TRPV1<sup>cre/wt</sup>::DTA<sup>fl/wt</sup> (G, L), OVA-challenged Tac1<sup>-/-</sup> (H, M) or OVA-challenge TRPV1<sup>cre/wt</sup>::DTA<sup>fl/wt</sup> + [Sar<sup>9</sup>, Met(O<sub>2</sub>)<sup>11</sup>]-SP (I, N)  
195 mice lung. Scale of 70 μm (I) and 30 μm (N), respectively. Mean ± S.E.M; Two-tailed unpaired Student's t-test.

Journal Pre-proof
